# Supplementary material for: Unfavorable food consumption in children up to school entry age: results from the nationwide German KiESEL study
Source: PubMed Central journal article supplement (PMC11246898; doi:10.3389/fnut.2024.1335934), 2024-07-01
Supplement: Data_Sheet_1.pdf [file Data_Sheet_1.pdf]

## *Supplementary Material*

### 1 Supplementary Tables

**Table S1:** Reporting checklist for observational studies in nutritional epidemiology – based on the STROBE-nut guidelines (1)

|                           |        | <i>Reporting Item</i>                                                                                                                                                                                                                                                                                                                                                                                                                    | <i>Page Number</i>                                                          |
|---------------------------|--------|------------------------------------------------------------------------------------------------------------------------------------------------------------------------------------------------------------------------------------------------------------------------------------------------------------------------------------------------------------------------------------------------------------------------------------------|-----------------------------------------------------------------------------|
| <b>Title and abstract</b> |        |                                                                                                                                                                                                                                                                                                                                                                                                                                          |                                                                             |
| Title                     | #1a    | Indicate the study's design with a commonly used term in the title or the abstract                                                                                                                                                                                                                                                                                                                                                       | p. 1                                                                        |
| Abstract                  | #1b    | Provide in the abstract an informative and balanced summary of what was done and what was found                                                                                                                                                                                                                                                                                                                                          | p. 1                                                                        |
|                           | #nut-1 | State the dietary/nutritional assessment method(s) used in the title or in the abstract.                                                                                                                                                                                                                                                                                                                                                 | p. 1                                                                        |
| <b>Introduction</b>       |        |                                                                                                                                                                                                                                                                                                                                                                                                                                          |                                                                             |
| Background / rationale    | #2     | Explain the scientific background and rationale for the investigation being reported                                                                                                                                                                                                                                                                                                                                                     | p. 2                                                                        |
| Objectives                | #3     | State specific objectives, including any prespecified hypotheses                                                                                                                                                                                                                                                                                                                                                                         | p. 2                                                                        |
| <b>Methods</b>            |        |                                                                                                                                                                                                                                                                                                                                                                                                                                          |                                                                             |
| Study design              | #4     | Present key elements of study design early in the paper                                                                                                                                                                                                                                                                                                                                                                                  | p. 2–3                                                                      |
| Setting                   | #5     | Describe the setting, locations, and relevant dates, including periods of recruitment, exposure, follow-up, and data collection                                                                                                                                                                                                                                                                                                          | p. 2–3                                                                      |
|                           | #nut-5 | Describe any characteristics of the study settings that might affect the dietary intake or nutritional status of the participants, if applicable.                                                                                                                                                                                                                                                                                        | Dietary assessment: p. 2–3, SES and region: Table 1, weighting factor: p. 4 |
| Eligibility               | #6a    | Cohort study: Give the eligibility criteria and the sources and methods of selection of participants. Describe methods of follow-up. Case-control study: Give the eligibility criteria and the sources and methods of case ascertainment and control selection. Give the rationale for the choice of cases and controls. Cross-sectional study: Give the eligibility criteria, and the sources and methods of selection of participants. | n/a, sampling performed within KiGGS Wave 2 (2)                             |
|                           | #6b    | Cohort study: For matched studies, give matching criteria and number of exposed and unexposed. Case-control study: For matched studies, give matching criteria and the number of controls per case.                                                                                                                                                                                                                                      | n/a, cross-sectional study                                                  |
|                           | #nut-6 | Report any particular dietary, physiologic, or nutritional characteristics that were considered when selecting the target population.                                                                                                                                                                                                                                                                                                    | n/a, representative sample                                                  |

|                              |          | <i>Reporting Item</i>                                                                                                                                                                                                                                            | <i>Page Number</i>                              |
|------------------------------|----------|------------------------------------------------------------------------------------------------------------------------------------------------------------------------------------------------------------------------------------------------------------------|-------------------------------------------------|
| Variables                    | #7       | Clearly define all outcomes, exposures, predictors, potential confounders, and effect modifiers. Give diagnostic criteria, if applicable                                                                                                                         | n/a, exploratory dietary survey                 |
|                              | #nut-7.1 | Clearly define foods, food groups, nutrients, or other food components (e.g., preparation method, taxonomical descriptors, classification, chemical form).                                                                                                       | p. 3, Table S2                                  |
|                              | #nut-7.2 | When calculating dietary patterns, describe the methods to obtain them and their nutritional properties.                                                                                                                                                         | n/a, no dietary patterns calculated             |
| Data sources and measurement | #8       | For each variable of interest give sources of data and details of methods of assessment (measurement). Describe comparability of assessment methods if there is more than one group. Give information separately for exposed and unexposed groups if applicable. | p. 2–3                                          |
|                              | #nut-8.1 | Describe the dietary assessment method(s) (e.g., portion size estimation, number of days and items recorded, how it was developed and administered, and how quality was ensured); report if and how supplement intake was assessed.                              | p. 2–3                                          |
|                              | #nut-8.2 | Describe and justify food-composition data used; explain the procedure to match food composition with consumption data; describe the use of conversion factors, if applicable                                                                                    | n/a, no food composition database used          |
|                              | #nut-8.3 | Describe the nutrient requirements, recommendations, or dietary guidelines and the evaluation approach used to compare intake with the dietary reference values, if applicable                                                                                   | p. 3                                            |
|                              | #nut-8.4 | When using nutritional biomarkers, additionally use the STROBE-ME; report the type of biomarkers used and usefulness as dietary exposure markers                                                                                                                 | n/a, no biomarkers used                         |
|                              | #nut-8.5 | Describe the assessment of nondietary data (e.g., nutritional status and influencing factors) and timing of the assessment of these variables in relation to dietary assessment                                                                                  | p. 3                                            |
|                              | #nut-8.6 | Report on the validity of the dietary or nutritional assessment methods and any internal or external validation used in the study, if applicable                                                                                                                 | p. 3, 8                                         |
| Bias                         | #9       | Describe any efforts to address potential sources of bias                                                                                                                                                                                                        | weighting factor: p. 4, misreporting: p. 3–4    |
|                              | #nut-9   | Report how bias in dietary or nutritional assessment was addressed (e.g., misreporting, changes in habits as a result of being measured, data imputation from other sources).                                                                                    | p. 3–4                                          |
| Study size                   | #10      | Explain how the study size was arrived at                                                                                                                                                                                                                        | n/a, sampling performed within KiGGS Wave 2 (2) |
| Quantitative variables       | #11      | Explain how quantitative variables were handled in the analyses. If applicable, describe which groupings were chosen, and why                                                                                                                                    | p. 4; age groups: p. 2                          |

|                            |           | <i>Reporting Item</i>                                                                                                                                                                                                                                                         | <i>Page Number</i>                                                                     |
|----------------------------|-----------|-------------------------------------------------------------------------------------------------------------------------------------------------------------------------------------------------------------------------------------------------------------------------------|----------------------------------------------------------------------------------------|
|                            | #nut-11   | Explain categorization of dietary/nutritional data (e.g., use of N-tiles and handling of nonconsumers) and the choice of reference category, if applicable.                                                                                                                   | p. 4, food groups: p. 3                                                                |
| Statistical methods        | #12a      | Describe all statistical methods, including those used to control for confounding                                                                                                                                                                                             | p. 4                                                                                   |
| Subgroups and interactions | #12b      | Describe any methods used to examine subgroups and interactions                                                                                                                                                                                                               | p. 4                                                                                   |
| Missing data               | #12c      | Explain how missing data were addressed                                                                                                                                                                                                                                       | p. 2 (missing food records); no missing food consumption data of included participants |
| Loss to follow up          | #12d      | Cohort study: if applicable, explain how loss to follow-up was addressed. Case-control study: if applicable, explain how matching of cases and controls was addressed. Cross-sectional study: if applicable, describe analytical methods taking account of sampling strategy. | n/a, no such methods used                                                              |
| Sensitivity analysis       | #12e      | Describe any sensitivity analyses                                                                                                                                                                                                                                             | n/a, no sensitivity analyses performed                                                 |
|                            | #nut-12.1 | Describe any statistical method used to combine dietary or nutritional data, if applicable.                                                                                                                                                                                   | n/a, no data combined                                                                  |
|                            | #nut-12.2 | Describe and justify the method for energy adjustments, intake modeling, and use of weighting factors, if applicable                                                                                                                                                          | p. 4                                                                                   |
|                            | #nut-12.3 | Report any adjustments for measurement error (i.e., from a validity or calibration study).                                                                                                                                                                                    | n/a, no adjustments performed                                                          |
| <b>Results</b>             |           |                                                                                                                                                                                                                                                                               |                                                                                        |
| Participants               | #13a      | Report numbers of individuals at each stage of study—eg numbers potentially eligible, examined for eligibility, confirmed eligible, included in the study, completing follow-up, and analysed. Give information separately for exposed and unexposed groups if applicable.    | p. 2, Figure S1                                                                        |
| Non-participation          | #13b      | Give reasons for non-participation at each stage                                                                                                                                                                                                                              | n/a, refer to Nowak et al., 2022 (3)                                                   |
| Participant journey        | #13c      | Consider the use of a flow diagram                                                                                                                                                                                                                                            | Figure S1                                                                              |
|                            | #nut-13   | Report the number of individuals excluded on the basis of missing, incomplete, or implausible dietary and nutritional data.                                                                                                                                                   | p. 2, Figure S1                                                                        |
| Descriptive data           | #14a      | Give characteristics of study participants (eg demographic, clinical, social) and information on exposures and potential confounders. Give information separately for exposed and unexposed groups if applicable.                                                             | p. 4, Table 1                                                                          |
| Missing data               | #14b      | Indicate number of participants with missing data for each variable of interest                                                                                                                                                                                               | Table 1, else no missing data                                                          |
| Follow-up time             | #14c      | Cohort study: Summarise follow-up time (eg, average and total amount)                                                                                                                                                                                                         | n/a, cross-sectional study                                                             |
|                            | #nut-14   | Give the distribution of participant characteristics across the exposure variables, if applicable; specify if food                                                                                                                                                            | no exposure variables; food consumption for total population: p. 5                     |

|                             |         | <i>Reporting Item</i>                                                                                                                                                                                                                                     | <i>Page Number</i>                                                                                                                                                                                      |
|-----------------------------|---------|-----------------------------------------------------------------------------------------------------------------------------------------------------------------------------------------------------------------------------------------------------------|---------------------------------------------------------------------------------------------------------------------------------------------------------------------------------------------------------|
|                             |         | consumption for the total population or consumers only was used to obtain results                                                                                                                                                                         |                                                                                                                                                                                                         |
| Outcome data                | #15     | Cohort study: report numbers of outcome events or summary measures over time. Case-control study: report numbers in each exposure category, or summary measures of exposure. Cross-sectional study: report numbers of outcome events or summary measures. | summary measures:<br>p. 4–5, Tables 1–2,<br>Tables S4–S9                                                                                                                                                |
| Main results                | #16a    | Give unadjusted estimates and, if applicable, confounder-adjusted estimates and their precision (eg, 95% confidence interval). Make clear which confounders were adjusted for and why they were included                                                  | Table 2, Tables S4–S9<br>(no adjustments)                                                                                                                                                               |
| Category boundaries         | #16b    | Report category boundaries when continuous variables were categorized                                                                                                                                                                                     | p. 2                                                                                                                                                                                                    |
| Relative and absolute risks | #16c    | If relevant, consider translating estimates of relative risk into absolute risk for a meaningful time period                                                                                                                                              | n/a, no RR calculated                                                                                                                                                                                   |
|                             | #nut-16 | Specify if nutrient intakes are reported with or without the inclusion of dietary supplement intake, if applicable.                                                                                                                                       | n/a, no nutrient intake calculated                                                                                                                                                                      |
| Other analyses              | #17     | Report other analyses done—eg analyses of subgroups and interactions, and sensitivity analyses                                                                                                                                                            | Subgroup analyses:<br><u>Toddlers/preschoolers:</u><br>p. 5, Tables 2, S4–S6,<br>Figure 1<br><u>Overweight/obesity:</u><br>p. 5–6, Table S7<br><u>Year by year:</u><br>p. 6, Tables S8, S9,<br>Figure 2 |
|                             | #nut-17 | Report any sensitivity analysis (e.g., exclusion of misreporters or outliers) and data imputation, if applicable                                                                                                                                          | n/a, not performed                                                                                                                                                                                      |
| <b>Discussion</b>           |         |                                                                                                                                                                                                                                                           |                                                                                                                                                                                                         |
| Key results                 | #18     | Summarise key results with reference to study objectives                                                                                                                                                                                                  | p. 7                                                                                                                                                                                                    |
| Limitations                 | #19     | Discuss limitations of the study, taking into account sources of potential bias or imprecision. Discuss both direction and magnitude of any potential bias.                                                                                               | p. 8                                                                                                                                                                                                    |
|                             | #nut-19 | Describe the main limitations of the data sources and assessment methods used and implications for the interpretation of the findings                                                                                                                     | p. 8                                                                                                                                                                                                    |
| Interpretation              | #20     | Give a cautious overall interpretation considering objectives, limitations, multiplicity of analyses, results from similar studies, and other relevant evidence.                                                                                          | p. 7–8                                                                                                                                                                                                  |
|                             | #nut-20 | Report the nutritional relevance of the findings, given the complexity of diet or nutrition as an exposure.                                                                                                                                               | p. 8                                                                                                                                                                                                    |
| Generalisability            | #21     | Discuss the generalisability (external validity) of the study results                                                                                                                                                                                     | p. 8                                                                                                                                                                                                    |
| <b>Other Information</b>    |         |                                                                                                                                                                                                                                                           |                                                                                                                                                                                                         |
| Funding                     | #22     | Give the source of funding and the role of the funders for the present study and, if applicable, for the original study on which the present article is based                                                                                             | p. 9                                                                                                                                                                                                    |

|                |           | <i>Reporting Item</i>                                                                         | <i>Page Number</i> |
|----------------|-----------|-----------------------------------------------------------------------------------------------|--------------------|
| Ethics         | #nut-22.1 | Describe the procedure for consent and study approval from ethics committee(s).               | p. 2               |
| Data statement | #nut-22.2 | Provide data collection tools and data as online material or explain how they can be accessed | p. 9               |

**Table S2:** Food groups and OMD recommendations for children aged 1–3 years and 4–6 years<sup>1</sup>

| Food groups covered by OMD (4) (n = 11)       | Examples                                                                                                                                                                                                                                                                                                                                                                                                                                                     | Recommended amount (4) |                      | Recommended share (4) |
|-----------------------------------------------|--------------------------------------------------------------------------------------------------------------------------------------------------------------------------------------------------------------------------------------------------------------------------------------------------------------------------------------------------------------------------------------------------------------------------------------------------------------|------------------------|----------------------|-----------------------|
|                                               |                                                                                                                                                                                                                                                                                                                                                                                                                                                              | 1–3 years              | 4–6 years            | all age groups        |
| <b>Eat plenty (plant-based foods)</b>         |                                                                                                                                                                                                                                                                                                                                                                                                                                                              |                        |                      |                       |
| Beverages                                     | Water, tea, malt coffee, commercial <sup>2</sup> teas and juices (ready-to-drink products)                                                                                                                                                                                                                                                                                                                                                                   | 600 mL/day             | 750 mL/day           | 37 % TFC              |
| Vegetables                                    | Vegetables, legumes, soy and pure soy products (i.e. unflavoured tofu), CCFs with vegetables as main ingredients                                                                                                                                                                                                                                                                                                                                             | 190 g/day              | 230 g/day            | 12 % TFC              |
| Fruit                                         | Fruit, fruit juices, smoothies, CCFs with fruit as main ingredient                                                                                                                                                                                                                                                                                                                                                                                           | 180 g/day              | 210 g/day            | 11 % TFC              |
| Carbohydrate foods <sup>3</sup> :             |                                                                                                                                                                                                                                                                                                                                                                                                                                                              |                        |                      | 13 % TFC              |
| Bread and cereals                             | Bread and bread rolls, cereals, cornflakes and muesli (mainly plain cereal flakes), CCFs with cereals as main ingredients                                                                                                                                                                                                                                                                                                                                    | 110 g/day              | 130 g/day            | 7 % TFC               |
| Starchy side dishes                           | Rice, pasta, potatoes and potato products                                                                                                                                                                                                                                                                                                                                                                                                                    | 100 g/day              | 120 g/day            | 6 % TFC               |
| <b>Eat in moderation (animal-based foods)</b> |                                                                                                                                                                                                                                                                                                                                                                                                                                                              |                        |                      |                       |
| Milk and milk products <sup>4</sup>           | Milk and milk products (non-sweetened), cheese, curd, human milk, milk-based drinks intended for young children, infant and follow-on formula (ready-to-drink products), CCFs with milk as main ingredients                                                                                                                                                                                                                                                  | 300 g/day              | 350 g/day            | 18 % TFC              |
| Meat and sausages                             | Meat, game, poultry, sausages                                                                                                                                                                                                                                                                                                                                                                                                                                | 30 g/day               | 35 g/day             | 2 % TFC               |
| Fish <sup>5</sup>                             | Fish, crustaceans, shellfish, fish products                                                                                                                                                                                                                                                                                                                                                                                                                  | 9 g/day                | 10 g/day             | 1 % TFC               |
| Eggs <sup>6</sup>                             | Eggs                                                                                                                                                                                                                                                                                                                                                                                                                                                         | 13 g/day               | 17 g/day             | 1 % TFC               |
| <b>Eat sparingly</b>                          |                                                                                                                                                                                                                                                                                                                                                                                                                                                              |                        |                      |                       |
| Fats and oils                                 | Vegetable oils, margarines, butter, lard                                                                                                                                                                                                                                                                                                                                                                                                                     | 20 g/day               | 20 g/day             | 1 % TFC               |
| <b>Tolerated</b>                              |                                                                                                                                                                                                                                                                                                                                                                                                                                                              |                        |                      |                       |
| Unfavorable foods                             | Sweets, sweet spreads, ice cream, desserts, cakes, cookies, pancakes, sweetened breakfast cereals, sweetened milk-products (e.g. sweetened fruit yoghurt), salty snack products (e.g. crisps, salted nuts), soft drinks, nectars and mixed products, coffee, cocoa, meat substitutes (excl. pure tofu), plant-based milk alternatives (PBMA), ready-made sauces (e.g. ketchup), CCFs with unfavorable foods as main ingredients, sugar added to foods/drinks | max.<br>115 kcal/day   | max.<br>135 kcal/day | max.<br>10 E%         |
| <b>Food group not covered by OMD (n = 1)</b>  |                                                                                                                                                                                                                                                                                                                                                                                                                                                              |                        |                      |                       |
| Nuts <sup>7</sup>                             | Unsweetened, unsalted nuts, kernels, seeds and nut butters                                                                                                                                                                                                                                                                                                                                                                                                   | -                      | -                    | -                     |

<sup>1</sup> CCF, commercial complementary foods; E%, percentage of energy intake; OMD, Optimized Mixed Diet; %TFC, percentage of total food consumption<sup>2</sup> Defined as products specifically labelled for infants and young children<sup>3</sup> For this analysis, the two groups of 'bread and cereals' and 'starchy side dishes' were combined into the group of 'carbohydrate foods', as these serve as mutual substitutes.<sup>4</sup> Recommendation given in milk equivalents.<sup>5</sup> Calculated from the weekly recommendation (1/7 of the weekly recommendation)<sup>6</sup> Calculated from the weekly recommendation (1/7 of the weekly recommendation), assuming an average weight of an egg of 60 g<sup>7</sup> No separate food group in the OMD, hence no recommendation available (-).

**Table S3:** Calculated cut-off values<sup>1</sup> for the classification of under- and over-reporting of energy intake at individual level (5)

|                       |                          | <b>Under-reporting</b> | <b>Over-reporting</b> |
|-----------------------|--------------------------|------------------------|-----------------------|
| <b>Age</b>            |                          |                        |                       |
| <b>Cut-off values</b> | Toddlers (1–3 years)     | < 0.92                 | > 2.12                |
|                       | Preschoolers (4–5 years) | < 1.06                 | > 2.42                |

<sup>1</sup> For the ratio of reported energy intake to estimated basal metabolic rate, based on a physical activity level of 1.4 and 1.6 for children aged 1–3 years and 4–5 years, respectively.

**Table S4:** Energy intake and food consumption in KiESEL toddlers and preschoolers (in kcal/day or g/day), stratified by sex (median, P5, P95)<sup>1</sup>

|                                                               | <b>Toddlers<br/>(1–3 years)</b> |                |                          |                | <b>Preschoolers<br/>(4–5 years)</b> |                |                          |                |
|---------------------------------------------------------------|---------------------------------|----------------|--------------------------|----------------|-------------------------------------|----------------|--------------------------|----------------|
|                                                               | <b>Boys<br/>n = 254</b>         |                | <b>Girls<br/>n = 247</b> |                | <b>Boys<br/>n = 200</b>             |                | <b>Girls<br/>n = 189</b> |                |
|                                                               | <b>Median</b>                   | <b>P5, P95</b> | <b>Median</b>            | <b>P5, P95</b> | <b>Median</b>                       | <b>P5, P95</b> | <b>Median</b>            | <b>P5, P95</b> |
| <b>Total energy intake (kcal/day)</b>                         | 1039                            | 705, 1410      | 945                      | 595, 1375      | 1349                                | 1063, 1785     | 1215                     | 873, 1572      |
| <b>Food groups (g/day)</b>                                    |                                 |                |                          |                |                                     |                |                          |                |
| Beverages                                                     | 370                             | 65, 843        | 368                      | 55, 935        | 525                                 | 50, 1095       | 530                      | 217, 1039      |
| Vegetables                                                    | 56                              | 10, 157        | 57                       | 12, 220        | 66                                  | 14, 186        | 72                       | 10, 169        |
| Fruit (total) <sup>2</sup>                                    | 185                             | 37, 401        | 184                      | 13, 435        | 220                                 | 25, 511        | 207                      | 0, 536         |
| Fruit juice and smoothies                                     | 34                              | 0, 227         | 39                       | 0, 300         | 72                                  | 0, 303         | 54                       | 0, 361         |
| Nuts                                                          | 0                               | 0, 4           | 0                        | 0, 7           | 0                                   | 0, 4           | 0                        | 0, 6           |
| Carbohydrate foods (total)                                    | 142                             | 56, 267        | 127                      | 59, 252        | 160                                 | 98, 298        | 180                      | 103, 303       |
| Bread and cereals                                             | 74                              | 20, 164        | 68                       | 15, 150        | 81                                  | 36, 153        | 83                       | 35, 149        |
| Starchy side dishes                                           | 69                              | 12, 139        | 61                       | 8, 138         | 77                                  | 28, 214        | 90                       | 24, 189        |
| Milk and milk products <sup>3</sup>                           | 219                             | 21, 549        | 209                      | 23, 520        | 201                                 | 25, 525        | 187                      | 55, 423        |
| Meat and sausages                                             | 29                              | 0, 87          | 29                       | 0, 86          | 52                                  | 6, 132         | 46                       | 10, 117        |
| Eggs                                                          | 3                               | 0, 26          | 2                        | 0, 30          | 5                                   | 0, 38          | 2                        | 0, 41          |
| Fish                                                          | 0                               | 0, 31          | 0                        | 0, 30          | 0                                   | 0, 38          | 0                        | 0, 48          |
| Fats and oils                                                 | 6                               | 1, 18          | 5                        | 0, 17          | 9                                   | 1, 22          | 8                        | 1, 19          |
| Unfavorable foods (total) <sup>2</sup>                        | 143                             | 24, 551        | 135                      | 24, 350        | 273                                 | 101, 737       | 173                      | 81, 607        |
| Sweets                                                        | 61                              | 11, 159        | 50                       | 10, 144        | 102                                 | 35, 233        | 86                       | 24, 177        |
| Soft drinks                                                   | 0                               | 0, 370         | 0                        | 0, 233         | 50                                  | 0, 516         | 25                       | 0, 330         |
| Sweetened milk products                                       | 30                              | 0, 135         | 25                       | 0, 127         | 27                                  | 0, 175         | 28                       | 0, 155         |
| <b>Combined food groups (g/day)</b>                           |                                 |                |                          |                |                                     |                |                          |                |
| Beverages + soft drinks + juices + smoothies                  | 490                             | 179, 1125      | 477                      | 160, 1012      | 733                                 | 330, 1283      | 694                      | 335, 1392      |
| Milk and milk products + sweetened milk products <sup>4</sup> | 263                             | 43, 577        | 257                      | 61, 536        | 295                                 | 47, 683        | 256                      | 83, 521        |

<sup>1</sup> Weighted data (n unweighted). KiESEL, Children's Nutrition Survey to Record Food Consumption; P, Percentile

<sup>2</sup> Note that only selected subgroups are presented. Hence, the sum of subgroups does not correspond to the amount of the superordinate group.

<sup>3</sup> As milk equivalents

<sup>4</sup> With sweetened milk products calculated as milk equivalents.



**Table S5:** Food consumption in KiESEL toddlers (in %TFC or E%), stratified by sex<sup>1</sup>

|                                                                         | Toddlers<br>(1–3 years) |               |        |            |                  |               |        |            |
|-------------------------------------------------------------------------|-------------------------|---------------|--------|------------|------------------|---------------|--------|------------|
|                                                                         | Boys<br>n = 254         |               |        |            | Girls<br>n = 247 |               |        |            |
|                                                                         | Mean (SD)               | 95% CI (mean) | Median | P5, P95    | Mean (SD)        | 95% CI (mean) | Median | P5, P95    |
| Beverages (%TFC)                                                        | 29.6 (13.7)             | 28.0–31.3     | 30.0   | 7.5, 50.0  | 31.3 (14.8)*     | 29.4–33.1     | 30.9   | 7.6, 58.8  |
| Vegetables (%TFC)                                                       | 5.5 (4.5)               | 5.0–6.1       | 4.4    | 0.9, 15.8  | 5.6 (3.9)        | 5.1–6.0       | 4.5    | 1.2, 14.0  |
| Fruit (total, %TFC)                                                     | 15.5 (8.5)              | 14.5–16.6     | 14.3   | 2.9, 29.2  | 15.6 (9.2)*      | 14.4–16.7     | 15.0   | 1.0, 33.6  |
| Carbohydrate foods<br>(total, %TFC)                                     | 12.0 (5.4)              | 11.4–12.7     | 11.7   | 4.2, 21.9  | 11.8 (6.3)       | 11.0–12.6     | 10.3   | 5.1, 21.5  |
| Milk and milk products (%TFC) <sup>2</sup>                              | 17.9 (11.5)*            | 16.5–19.3     | 16.1   | 1.6, 39.8  | 18.6 (11.5)*     | 17.2–20.1     | 19.6   | 1.5, 37.9  |
| Meat and sausages (%TFC)                                                | 2.6 (2.0)*              | 2.4–2.8       | 2.3    | 0.0, 6.4   | 2.8 (2.5)        | 2.5–3.1       | 2.6    | 0.0, 8.6   |
| Eggs (%TFC)                                                             | 0.6 (0.8)               | 0.5–0.7       | 0.2    | 0.0, 2.1   | 0.7 (1.0)        | 0.5–0.8       | 0.1    | 0.0, 2.7   |
| Fish (%TFC)                                                             | 0.5 (0.8)               | 0.4–0.6       | 0.0    | 0.0, 2.1   | 0.5 (0.9)        | 0.4–0.6       | 0.0    | 0.0, 2.5   |
| Fats and oils (%TFC)                                                    | 0.5 (0.5)               | 0.5–0.6       | 0.4    | 0.1, 1.4   | 0.6 (0.5)        | 0.5–0.6       | 0.4    | 0.0, 1.6   |
| Unfavorable foods<br>(total, E%) <sup>3</sup>                           | 27.2 (12.8)*            | 25.7–28.8     | 26.5   | 8.0, 49.8  | 25.7 (13.4)*     | 24.1–27.4     | 24.8   | 6.6, 50.2  |
| Soft drinks (E%)                                                        | 2.4 (5.5)               | 1.7–3.1       | 0.0    | 0.0, 13.3  | 1.8 (3.8)        | 1.3–2.2       | 0.0    | 0.0, 8.1   |
| Sweets (E%)                                                             | 18.2 (9.6)*             | 17.0–19.3     | 18.1   | 4.4, 37.9  | 17.5 (10.2)*     | 16.2–18.7     | 16.2   | 2.6, 34.3  |
| Sweetened milk products (E%)                                            | 4.4 (5.9)               | 3.7–5.1       | 2.8    | 0.0, 14.0  | 4.2 (5.2)        | 3.5–4.8       | 2.5    | 0.0, 16.4  |
| <b>Combined food groups</b>                                             |                         |               |        |            |                  |               |        |            |
| Beverages + soft drinks + juices + smoothies<br>(%TFC)                  | 39.7 (13.9)*            | 38.0–41.4     | 41.3   | 17.6, 64.4 | 40.6 (15.5)*     | 38.7–42.5     | 39.9   | 15.9, 67.1 |
| Milk and milk products + sweetened milk<br>products (%TFC) <sup>4</sup> | 22.0 (11.5)*            | 20.6–23.4     | 21.4   | 3.8, 42.4  | 22.4 (11.5)*     | 21.0–23.9     | 23.2   | 5.2, 39.4  |

<sup>1</sup> Weighted data (n unweighted). CI, Confidence interval; E%, percentage of energy intake; KiESEL, Children's Nutrition Survey to Record Food Consumption; P, Percentile; SD, standard deviation; %TFC, percentage of total food consumption

<sup>2</sup> As milk equivalents

<sup>3</sup> Note that only selected subgroups are presented. Hence, the sum of subgroups does not correspond to the amount of the superordinate group.

<sup>4</sup> With sweetened milk products calculated as milk equivalents.

\* Significant difference between preschoolers and toddlers of the same sex (see Table S6); **bold** = significant difference between boys and girls within one age group (non-overlapping 95% CIs)

**Table S6:** Food consumption in KiESEL preschoolers (in %TFC or E%), stratified by sex<sup>1</sup>

|                                                                         | Preschoolers<br>(4–5 years) |               |        |            |                     |               |        |            |
|-------------------------------------------------------------------------|-----------------------------|---------------|--------|------------|---------------------|---------------|--------|------------|
|                                                                         | Boys<br>n = 200             |               |        |            | Girls<br>n = 189    |               |        |            |
|                                                                         | Mean (SD)                   | 95% CI (mean) | Median | P5, P95    | Mean (SD)           | 95% CI (mean) | Median | P5, P95    |
| Beverages (%TFC)                                                        | <b>31.6</b> (15.3)          | 29.5–33.7     | 30.5   | 4.3, 55.3  | <b>36.2</b> (14.1)* | 34.2–38.2     | 34.5   | 16.7, 56.7 |
| Vegetables (%TFC)                                                       | 4.6 (3.2)                   | 4.2–5.0       | 4.2    | 0.8, 10.6  | 4.9 (3.0)           | 4.5–5.3       | 4.4    | 0.6, 11.1  |
| Fruit (total, %TFC)                                                     | 14.0 (9.0)                  | 12.8–15.2     | 13.9   | 1.8, 28.2  | 13.1 (9.2)*         | 11.8–14.3     | 11.9   | 0.0, 29.4  |
| Carbohydrate foods<br>(total, %TFC)                                     | <b>10.9</b> (4.0)           | 10.3–11.4     | 9.7    | 5.9, 19.3  | <b>12.2</b> (4.8)   | 11.5–12.8     | 11.5   | 6.2, 21.0  |
| Milk and milk products (%TFC) <sup>2</sup>                              | 14.1 (9.4)*                 | 12.8–15.4     | 12.0   | 1.2, 30.3  | 13.3 (7.8)*         | 12.2–14.3     | 11.9   | 3.4, 28.7  |
| Meat and sausages (%TFC)                                                | 3.5 (2.6)*                  | 3.2–3.9       | 3.2    | 0.4, 9.3   | 3.4 (2.3)           | 3.0–3.7       | 2.9    | 0.5, 8.0   |
| Eggs (%TFC)                                                             | 0.6 (0.8)                   | 0.5–0.7       | 0.3    | 0.0, 2.3   | 0.7 (1.1)           | 0.6–0.9       | 0.2    | 0.0, 3.8   |
| Fish (%TFC)                                                             | 0.5 (1.0)                   | 0.3–0.6       | 0.0    | 0.0, 2.4   | 0.6 (1.1)           | 0.5–0.8       | 0.0    | 0.0, 3.2   |
| Fats and oils (%TFC)                                                    | 0.6 (0.5)                   | 0.6–0.7       | 0.5    | 0.1, 1.5   | 0.6 (0.5)           | 0.5–0.7       | 0.5    | 0.1, 1.4   |
| Unfavorable foods<br>(total, E%) <sup>3</sup>                           | <b>35.9</b> (11.6)*         | 34.4–37.5     | 35.8   | 17.9, 56.0 | <b>31.7</b> (10.7)* | 30.2–33.2     | 29.9   | 17.2, 49.7 |
| Soft drinks (E%)                                                        | 3.3 (5.0)                   | 2.6–3.9       | 1.5    | 0.0, 17.3  | 2.1 (3.7)           | 1.6–2.6       | 0.8    | 0.0, 7.7   |
| Sweets (E%)                                                             | 24.5 (11.4)*                | 23.0–26.1     | 23.4   | 8.5, 47.0  | 21.8 (10.0)*        | 20.4–23.2     | 20.5   | 6.9, 38.2  |
| Sweetened milk products (E%)                                            | 4.6 (7.1)                   | 3.6–5.6       | 2.3    | 0.0, 15.9  | 4.3 (5.4)           | 3.6–5.1       | 2.6    | 0.0, 14.4  |
| <b>Combined food groups</b>                                             |                             |               |        |            |                     |               |        |            |
| Beverages + soft drinks + juices + smoothies<br>(%TFC)                  | 46.0 (12.3)*                | 44.4–47.7     | 45.1   | 24.6, 68.5 | 46.7 (11.5)*        | 45.0–48.3     | 46.9   | 30.8, 68.5 |
| Milk and milk products + sweetened milk<br>products (%TFC) <sup>4</sup> | 18.7 (10.8)*                | 17.2–20.1     | 18.5   | 3.4, 40.0  | 17.3 (8.6)*         | 16.1–18.5     | 16.1   | 5.0, 34.4  |

<sup>1</sup> Weighted data (n unweighted). CI, Confidence interval; E%, percentage of energy intake; KiESEL, Children's Nutrition Survey to Record Food Consumption; P, Percentile; SD, standard deviation; %TFC, percentage of total food consumption

<sup>2</sup> As milk equivalents

<sup>3</sup> Note that only selected subgroups are presented. Hence, the sum of subgroups does not correspond to the amount of the superordinate group.

<sup>4</sup> With sweetened milk products calculated as milk equivalents.

\* Significant difference between preschoolers and toddlers of the same sex (see Table S5); **bold** = significant difference between boys and girls within one age group (non-overlapping 95% CIs)

**Table S7:** Energy intake and food consumption in KiESEL toddlers and preschoolers (in kcal/day, g/day, %TFC or E%), classified as having overweight or obesity, stratified by sex<sup>1</sup>

|                                                  | Toddlers<br>(1–3 years)                |                  |        |           |                                         |                  |        |           | Preschoolers<br>(4–5 years)            |                  |        |               |                                         |                  |        |               |
|--------------------------------------------------|----------------------------------------|------------------|--------|-----------|-----------------------------------------|------------------|--------|-----------|----------------------------------------|------------------|--------|---------------|-----------------------------------------|------------------|--------|---------------|
|                                                  | Boys with overweight/obesity<br>n = 14 |                  |        |           | Girls with overweight/obesity<br>n = 15 |                  |        |           | Boys with overweight/obesity<br>n = 19 |                  |        |               | Girls with overweight/obesity<br>n = 24 |                  |        |               |
|                                                  | Mean<br>(SD)                           | 95% CI<br>(mean) | Median | P5, P95   | Mean<br>(SD)                            | 95% CI<br>(mean) | Median | P5, P95   | Mean<br>(SD)                           | 95% CI<br>(mean) | Median | P5, P95       | Mean<br>(SD)                            | 95% CI<br>(mean) | Median | P5, P95       |
| Total energy intake<br>(kcal/day)                | 1088<br>(206)                          | 969–<br>1206     | 1082   | 778, 1580 | 941<br>(152)                            | 857–<br>1025     | 867    | 756, 1249 | 1542<br>(276)                          | 1409–<br>1675    | 1470   | 1142,<br>2282 | 1436<br>(267)                           | 1324–<br>1549    | 1440   | 1045,<br>1950 |
| Vegetables (g/day)                               | 66<br>(45)                             | 40–<br>92        | 50     | 19, 200   | 71<br>(56)                              | 40–<br>101       | 55     | 18, 242   | 73<br>(49)                             | 50–<br>97        | 62     | 8, 186        | 89<br>(61)                              | 63–<br>115       | 78     | 21, 198       |
| Milk and milk<br>products (g/day) <sup>2</sup>   | 255<br>(164)                           | 161–<br>350      | 205    | 79, 663   | 237<br>(114)                            | 174–<br>300      | 236    | 88, 423   | 345<br>(248)                           | 225–<br>464      | 306    | 1, 858        | 227<br>(136)                            | 169–<br>284      | 204    | 20, 424       |
| Meat and sausages<br>(g/day)                     | 37<br>(24)                             | 23–<br>51        | 38     | 0, 81     | 36<br>(42)                              | 13–<br>59        | 35     | 0, 160    | 72<br>(46)                             | 50–<br>95        | 79     | 6, 164        | 60<br>(39)                              | 44–<br>77        | 54     | 10, 140       |
| Unfavorable foods<br>(total, g/day) <sup>3</sup> | 194<br>(204)                           | 76–<br>311       | 120    | 8, 799    | 128<br>(97)                             | 75–<br>182       | 137    | 29, 369   | 308<br>(242)                           | 192–<br>425      | 244    | 3, 1048       | 263<br>(137)                            | 205–<br>320      | 231    | 91, 493       |
| Vegetables (%TFC)                                | 5.1<br>(5.4)                           | 1.9–<br>8.2      | 3.5    | 2.1, 23.1 | 5.5<br>(4.1)                            | 3.2–<br>7.8      | 4.4    | 1.2, 17.8 | 4.1<br>(2.6)                           | 2.8–<br>5.3      | 3.5    | 0.4, 10.2     | 5.2<br>(3.7)                            | 3.7–<br>6.8      | 4.3    | 1.6, 13.3     |
| Milk and milk<br>products (%TFC) <sup>2</sup>    | 18.1<br>(12.5)                         | 10.9–<br>25.3    | 13.6   | 5.4, 49.6 | 18.4<br>(8.1)                           | 13.9–<br>22.9    | 18.9   | 5.9, 32.1 | 19.4<br>(14.2)                         | 12.6–<br>26.3    | 17.1   | 0.0, 57.1     | 13.4<br>(7.8)                           | 10.1–<br>16.7    | 12.5   | 2.0, 25.0     |
| Meat and sausages<br>(%TFC)                      | 2.4<br>(1.5)                           | 1.5–<br>3.2      | 2.2    | 0.0, 4.4  | 2.9<br>(3.5)                            | 1.0–<br>4.8      | 2.9    | 0.0, 13.0 | 4.0<br>(2.5)                           | 2.8–<br>5.2      | 4.1    | 0.4, 10.2     | 3.7<br>(2.6)                            | 2.6–<br>4.8      | 3.4    | 0.5, 8.3      |
| Unfavorable foods<br>(total, E%) <sup>3</sup>    | 25.8<br>(10.4)                         | 19.7–<br>31.8    | 24.1   | 2.2, 44.2 | 23.0<br>(13.4)                          | 15.6–<br>30.4    | 17.6   | 6.2, 59.2 | 30.8<br>(14.3)                         | 23.9–<br>37.7    | 30.8   | 1.0, 56.5     | 30.3<br>(9.9)                           | 26.1–<br>34.5    | 29.1   | 17.2, 44.8    |

<sup>1</sup> Unweighted data. Overweight and obesity were defined as follows: children ≤ 60 months: BMI z-score > 2 to ≤ 3 SD overweight, > 3 SD obesity; children ≥ 61 months: BMI z-score > 1 to ≤ 2 SD overweight, > 2 SD obesity (6). CI, confidence interval; E%, percentage of energy intake; KiESEL, Children's Nutrition Survey to Record Food Consumption; P, Percentile; SD, standard deviation; %TFC, percentage of total food consumption

<sup>2</sup> As milk equivalents

<sup>3</sup> Note that only selected subgroups are presented. Hence, the sum of subgroups does not correspond to the amount of the superordinate group.

<sup>4</sup> With sweetened milk products calculated as milk equivalents.

**Table S8:** Food consumption in KiESEL toddlers by year of age (in g/1000 kcal)<sup>1</sup>

|                                                   | 1 year<br>n = 190 |                  |        |          | 2 years<br>n = 164 |                  |        |          | 3 years<br>n = 147 |                  |        |          |
|---------------------------------------------------|-------------------|------------------|--------|----------|--------------------|------------------|--------|----------|--------------------|------------------|--------|----------|
|                                                   | Mean<br>(SD)      | 95% CI<br>(mean) | Median | P5, P95  | Mean<br>(SD)       | 95% CI<br>(mean) | Median | P5, P95  | Mean<br>(SD)       | 95% CI<br>(mean) | Median | P5, P95  |
| Beverages (g/1000 kcal)                           | 399 (293)         | 355–443          | 326    | 62, 1141 | 451 (355)          | 397–506          | 373    | 40, 1113 | 404 (217)          | 372–437          | 380    | 120, 797 |
| Vegetables (g/1000 kcal)                          | 85 (61)           | 76–94            | 67     | 9, 222   | 70 (50)            | 63–78            | 66     | 11, 157  | 57 (50)            | 50–65            | 45     | 12, 170  |
| Fruit (total, g/1000 kcal)                        | 194 (113)         | 177–211          | 181    | 2, 400   | 186 (111)          | 169–203          | 181    | 31, 385  | 202 (125)          | 183–220          | 186    | 51, 468  |
| Nuts (g/1000 kcal)                                | 1 (3)             | 0–1              | 0      | 0, 1     | 1 (5)              | 1–2              | 0      | 0, 7     | 1 (4)              | 0–2              | 0      | 0, 7     |
| Carbohydrate foods (total, g/1000 kcal)           | 155 (106)         | 139–171          | 139    | 51, 295  | 150 (54)           | 142–159          | 143    | 77, 253  | 139 (56)           | 131–147          | 135    | 63, 227  |
| Bread and cereals (g/1000 kcal)                   | 87 (103)          | 71–102           | 70     | 9, 201   | 75 (38)            | 69–80            | 71     | 27, 151  | 73 (35)            | 68–78            | 73     | 21, 138  |
| Starchy side dishes (g/1000 kcal)                 | 69 (38)           | 63–74            | 65     | 0, 131   | 76 (39)            | 70–82            | 74     | 23, 140  | 66 (41)            | 60–72            | 62     | 15, 128  |
| Milk and milk products (g/1000 kcal) <sup>2</sup> | 275 (140)         | 254–296          | 246    | 66, 583  | 220 (168)          | 194–245          | 197    | 2, 577   | 198 (142)          | 177–219          | 180    | 19, 398  |
| Meat and sausages (g/1000 kcal)                   | 27 (22)           | 23–30            | 23     | 0, 69    | 34 (26)            | 30–38            | 28     | 0, 89    | 38 (26)            | 34–41            | 39     | 3, 89    |
| Eggs (g/1000 kcal)                                | 6 (9)             | 5–7              | 1      | 0, 26    | 8 (11)             | 6–10             | 2      | 0, 31    | 9 (13)             | 7–11             | 6      | 0, 32    |
| Fish (g/1000 kcal)                                | 4 (8)             | 3–5              | 0      | 0, 20    | 8 (11)             | 6–9              | 0      | 0, 32    | 7 (13)             | 5–9              | 0      | 0, 35    |
| Fats and oils (g/1000 kcal)                       | 6 (5)             | 5–7              | 5      | 0, 16    | 8 (6)              | 7–8              | 6      | 1, 18    | 7 (6)              | 6–8              | 6      | 1, 16    |
| Unfavorable foods (total, g/1000 kcal)            | 142 (151)         | 119–165          | 101    | 12, 366  | 178 (170)          | 152–204          | 132    | 40, 639  | 204 (170)          | 179–230          | 167    | 45, 478  |

<sup>1</sup> Weighted data (n unweighted). CI, Confidence interval; KiESEL, Children's Nutrition Survey to Record Food Consumption; P, Percentile; SD, standard deviation

<sup>2</sup> As milk equivalents

**Table S9:** Food consumption in KiESEL preschoolers by year of age (in g/1000 kcal)<sup>1</sup>

|                                                   | 4 years<br>n = 164 |                  |        |          | 5 years<br>n = 226 |               |        |         |
|---------------------------------------------------|--------------------|------------------|--------|----------|--------------------|---------------|--------|---------|
|                                                   | Mean (SD)          | 95% CI<br>(mean) | Median | P5, P95  | Mean (SD)          | 95% CI (mean) | Median | P5, P95 |
| Beverages (g/1000 kcal)                           | 517 (384)          | 457–576          | 410    | 121, 952 | 421 (243)          | 391–451       | 387    | 79, 801 |
| Vegetables (g/1000 kcal)                          | 65 (40)            | 59–71            | 63     | 12, 120  | 56 (39)            | 51–61         | 48     | 5, 130  |
| Fruit (total, g/1000 kcal)                        | 192 (113)          | 174–209          | 180    | 25, 403  | 153 (115)          | 139–167       | 140    | 0, 365  |
| Nuts (g/1000 kcal)                                | 1 (3)              | 1–1              | 0      | 0, 5     | 1 (2)              | 0–1           | 0      | 0, 3    |
| Carbohydrate foods (total, g/1000 kcal)           | 142 (52)           | 134–150          | 138    | 75, 254  | 140 (46)           | 134–145       | 131    | 84, 219 |
| Bread and cereals (g/1000 kcal)                   | 62 (26)            | 58–66            | 56     | 30, 101  | 70 (29)            | 66–73         | 69     | 26, 118 |
| Starchy side dishes (g/1000 kcal)                 | 81 (46)            | 73–88            | 75     | 19, 185  | 70 (43)            | 65–75         | 64     | 23, 154 |
| Milk and milk products (g/1000 kcal) <sup>2</sup> | 178 (113)          | 160–195          | 160    | 33, 373  | 164 (101)          | 151–176       | 150    | 20, 327 |
| Meat and sausages (g/1000 kcal)                   | 38 (26)            | 34–42            | 35     | 5, 93    | 43 (26)            | 40–46         | 42     | 6, 90   |
| Eggs (g/1000 kcal)                                | 7 (10)             | 6–9              | 3      | 0, 32    | 8 (12)             | 7–9           | 3      | 0, 31   |
| Fish (g/1000 kcal)                                | 6 (11)             | 5–8              | 0      | 0, 39    | 6 (13)             | 5–8           | 0      | 0, 40   |
| Fats and oils (g/1000 kcal)                       | 6 (4)              | 6–7              | 6      | 0, 13    | 8 (5)              | 7–9           | 7      | 1, 17   |
| Unfavorable foods (total, g/1000 kcal)            | 209 (130)          | 189–229          | 188    | 69, 502  | 204 (136)          | 187–221       | 179    | 65, 474 |

<sup>1</sup> Weighted data (n unweighted). CI, Confidence interval; KiESEL, Children's Nutrition Survey to Record Food Consumption; P, Percentile; SD, standard deviation

<sup>2</sup> As milk equivalents

## 2 Supplementary figures

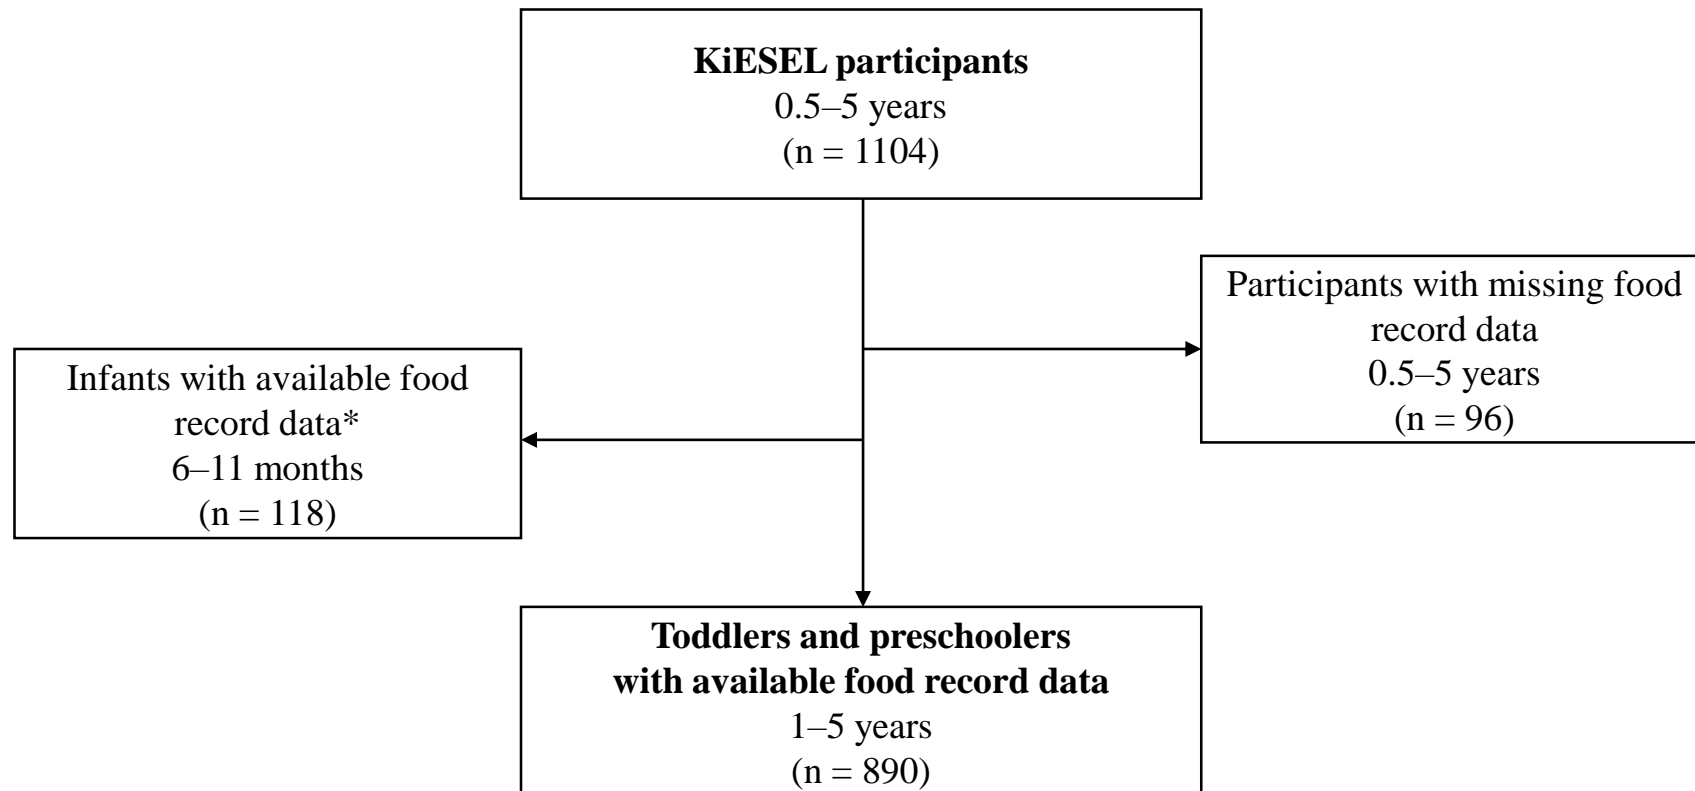

**Figure S1:** Flow chart of the study population; KiESEL, Children’s Nutrition Survey to Record Food Consumption. \* Infants will be reported separately.

| $\text{Milk equivalent factor} = \frac{\text{protein content}_{\text{subgroup}}^1}{\text{protein content}_{\text{raw milk}}}$                                                                                                                                                                                                |  | <table border="1"> <thead> <tr> <th data-bbox="1102 186 1407 219"><u>Milk product subgroup</u></th> <th data-bbox="1711 186 1932 251"><u>Calculated milk equivalent factor</u></th> </tr> </thead> <tbody> <tr> <td data-bbox="1102 267 1396 300">milk and milk products<sup>2</sup></td> <td data-bbox="1795 267 1848 300">1.0</td> </tr> <tr> <td data-bbox="1102 316 1249 349">hard cheese</td> <td data-bbox="1795 316 1848 349">7.0</td> </tr> <tr> <td data-bbox="1102 365 1249 397">soft cheese</td> <td data-bbox="1795 365 1848 397">4.0</td> </tr> <tr> <td data-bbox="1102 414 1417 446">sweetened milk products<sup>3</sup></td> <td data-bbox="1795 414 1848 446">1.3</td> </tr> <tr> <td data-bbox="1102 462 1249 495">human milk</td> <td data-bbox="1795 462 1848 495">0.3</td> </tr> <tr> <td data-bbox="1102 511 1648 584">infant and follow-on formula including milk-based drinks intended for young children</td> <td data-bbox="1795 511 1848 544">0.4</td> </tr> <tr> <td data-bbox="1102 600 1606 673">CCFs with milk or milk products as main ingredient</td> <td data-bbox="1795 600 1848 633">0.9</td> </tr> </tbody> </table> | <u>Milk product subgroup</u> | <u>Calculated milk equivalent factor</u> | milk and milk products <sup>2</sup> | 1.0 | hard cheese | 7.0 | soft cheese | 4.0 | sweetened milk products <sup>3</sup> | 1.3 | human milk | 0.3 | infant and follow-on formula including milk-based drinks intended for young children | 0.4 | CCFs with milk or milk products as main ingredient | 0.9 |
|------------------------------------------------------------------------------------------------------------------------------------------------------------------------------------------------------------------------------------------------------------------------------------------------------------------------------|------------------------------------------------------------------------------------|-----------------------------------------------------------------------------------------------------------------------------------------------------------------------------------------------------------------------------------------------------------------------------------------------------------------------------------------------------------------------------------------------------------------------------------------------------------------------------------------------------------------------------------------------------------------------------------------------------------------------------------------------------------------------------------------------------------------------------------------------------------------------------------------------------------------------------------------------------------------------------------------------------------------------------------------------------------------------------------------------------------------------------------------------------------------------------------------------------------------------------------------------------------|------------------------------|------------------------------------------|-------------------------------------|-----|-------------|-----|-------------|-----|--------------------------------------|-----|------------|-----|--------------------------------------------------------------------------------------|-----|----------------------------------------------------|-----|
| <u>Milk product subgroup</u>                                                                                                                                                                                                                                                                                                 | <u>Calculated milk equivalent factor</u>                                           |                                                                                                                                                                                                                                                                                                                                                                                                                                                                                                                                                                                                                                                                                                                                                                                                                                                                                                                                                                                                                                                                                                                                                           |                              |                                          |                                     |     |             |     |             |     |                                      |     |            |     |                                                                                      |     |                                                    |     |
| milk and milk products <sup>2</sup>                                                                                                                                                                                                                                                                                          | 1.0                                                                                |                                                                                                                                                                                                                                                                                                                                                                                                                                                                                                                                                                                                                                                                                                                                                                                                                                                                                                                                                                                                                                                                                                                                                           |                              |                                          |                                     |     |             |     |             |     |                                      |     |            |     |                                                                                      |     |                                                    |     |
| hard cheese                                                                                                                                                                                                                                                                                                                  | 7.0                                                                                |                                                                                                                                                                                                                                                                                                                                                                                                                                                                                                                                                                                                                                                                                                                                                                                                                                                                                                                                                                                                                                                                                                                                                           |                              |                                          |                                     |     |             |     |             |     |                                      |     |            |     |                                                                                      |     |                                                    |     |
| soft cheese                                                                                                                                                                                                                                                                                                                  | 4.0                                                                                |                                                                                                                                                                                                                                                                                                                                                                                                                                                                                                                                                                                                                                                                                                                                                                                                                                                                                                                                                                                                                                                                                                                                                           |                              |                                          |                                     |     |             |     |             |     |                                      |     |            |     |                                                                                      |     |                                                    |     |
| sweetened milk products <sup>3</sup>                                                                                                                                                                                                                                                                                         | 1.3                                                                                |                                                                                                                                                                                                                                                                                                                                                                                                                                                                                                                                                                                                                                                                                                                                                                                                                                                                                                                                                                                                                                                                                                                                                           |                              |                                          |                                     |     |             |     |             |     |                                      |     |            |     |                                                                                      |     |                                                    |     |
| human milk                                                                                                                                                                                                                                                                                                                   | 0.3                                                                                |                                                                                                                                                                                                                                                                                                                                                                                                                                                                                                                                                                                                                                                                                                                                                                                                                                                                                                                                                                                                                                                                                                                                                           |                              |                                          |                                     |     |             |     |             |     |                                      |     |            |     |                                                                                      |     |                                                    |     |
| infant and follow-on formula including milk-based drinks intended for young children                                                                                                                                                                                                                                         | 0.4                                                                                |                                                                                                                                                                                                                                                                                                                                                                                                                                                                                                                                                                                                                                                                                                                                                                                                                                                                                                                                                                                                                                                                                                                                                           |                              |                                          |                                     |     |             |     |             |     |                                      |     |            |     |                                                                                      |     |                                                    |     |
| CCFs with milk or milk products as main ingredient                                                                                                                                                                                                                                                                           | 0.9                                                                                |                                                                                                                                                                                                                                                                                                                                                                                                                                                                                                                                                                                                                                                                                                                                                                                                                                                                                                                                                                                                                                                                                                                                                           |                              |                                          |                                     |     |             |     |             |     |                                      |     |            |     |                                                                                      |     |                                                    |     |
| <p><sup>1</sup> The protein content of the subgroup was calculated as protein intake per amount of food, as observed in the sample.</p> <p><sup>2</sup> The group of milk and milk products mainly contained milk.</p> <p><sup>3</sup> The group of sweetened milk products mainly contained sweetened yoghurt and curd.</p> |                                                                                    |                                                                                                                                                                                                                                                                                                                                                                                                                                                                                                                                                                                                                                                                                                                                                                                                                                                                                                                                                                                                                                                                                                                                                           |                              |                                          |                                     |     |             |     |             |     |                                      |     |            |     |                                                                                      |     |                                                    |     |

**Figure S2:** Equation (left) and calculated milk equivalent factors per milk product subgroup (right): CCF, commercial complementary foods, the term ‘commercial’ refers to products specifically labelled for consumption by infants and young children

### 3 References

1. Lachat C, Hawwash D, Ocké MC, Berg C, Forsum E, Hörnell A, et al. Strengthening the Reporting of Observational Studies in Epidemiology - nutritional epidemiology (STROBE-nut): An extension of the STROBE statement. *Nutr Bull* (2016) 41(3):240–51. Epub 20160814. doi: 10.1111/nbu.12217.
2. Mauz E, Gößwald A, Kamtsiuris P, Hoffmann R, Lange M, von Schenck U, et al. New data for action. Data collection for KiGGS Wave 2 has been completed. *J Health Monit* (2017) 2(Suppl 3):S2–28. doi: 10.17886/RKI-GBE-2017-099.
3. Nowak N, Diouf F, Golsong N, Höpfner T, Lindtner O. KiESEL – the children’s nutrition survey to record food consumption for the youngest in Germany. *BMC nutrition* (2022) 8(1):64. doi: 10.1186/s40795-022-00527-6.
4. Kersting M, Kalhoff H, Lücke T. Von Nährstoffen zu Lebensmitteln und Mahlzeiten: das Konzept der Optimierten Mischkost für Kinder und Jugendliche in Deutschland [From Nutrients to Food and Meals: The Concept of the Optimized Mixed Diet for Children and Adolescents in Germany]. *Aktuel Ernährungsmed* (2017) 42(4):304–15. doi: 10.1055/s-0043-116499.
5. European Food Safety Authority (EFSA). Example of a protocol for identification of misreporting (under- and overreporting of energy intake) based on the PILOT-PANEU project. 2013). Available from: [www.efsa.europa.eu/sites/default/files/efsa\\_rep/blobserver\\_assets/3944A-8-2-1.pdf](http://www.efsa.europa.eu/sites/default/files/efsa_rep/blobserver_assets/3944A-8-2-1.pdf) [Accessed March 7, 2024].
6. de Onis M, Lobstein T. Defining obesity risk status in the general childhood population: which cut-offs should we use? *Int J Pediatr Obes* (2010) 5(6):458–60. Epub 20100317. doi: 10.3109/17477161003615583.
